# Supplementary material for: Improvements in identification and quantitation of pesticide residues in food by LC-QTOF using sequential mass window acquisition (SWATH®)
Source: Royal Society of Chemistry journal article supplement (doi:10.1039/c8ay00678d), 2018-01-01
Supplement: c8ay00678d1.pdf [file c8ay00678d1.pdf]

**Table S1.** Acquisition and identification parameters for the compounds studied.

| Name                                    | Ion       | Chemical Formula | Exact Mass (amu) | Retention Time (min) | Ion Ratio (F/P)* |
|-----------------------------------------|-----------|------------------|------------------|----------------------|------------------|
| <i>Compounds evaluated in Baby Food</i> |           |                  |                  |                      |                  |
| Demeton-S-methyl sulfone                | Precursor | C6H15O5PS2       | 263.01713        | 4.18                 |                  |
|                                         | Fragment  | C4H10O3PS        | 169.0080         | 4.2                  | 0.11             |
| Demeton-S-methyl sulfoxide              | Precursor | C6H15O4PS2       | 247.02222        | 3.63                 |                  |
|                                         | Fragment  | C2H6O2PS         | 124.9818         | 4.2                  | 0.42             |
| Dimethoate                              | Precursor | C5H12NO3PS2      | 230.0069         | 6.68                 |                  |
|                                         | Fragment  | C4H8O3PS2        | 198.9654         | 6.68                 | 0.05             |
| Disulfoton sulfone                      | Precursor | C8H19O4PS3       | 307.02559        | 10.69                |                  |
|                                         | Fragment  | C2H6O2PS         | 124.9819         | 10.68                | 0.22             |
| Disulfoton sulfoxide                    | Precursor | C8H19O3PS3       | 291.03067        | 10.53                |                  |
|                                         | Fragment  | C4H10O2PS2       | 184.9847         | 10.52                | 0.23             |
| Ethoprosfos                             | Precursor | C8H19O2PS2       | 243.06369        | 12.71                |                  |
|                                         | Fragment  | H4O2PS2          | 130.9380         | 12.71                | 0.17             |
| Fensulfothion                           | Precursor | C11H17O4PS2      | 309.03787        | 10.91                |                  |
|                                         | Fragment  | C7H10O4PS2       | 252.9752         | 10.9                 | 0.06             |
| Fensulfothion oxon                      | Precursor | C11H17O5PS       | 293.06071        | 8.36                 |                  |
|                                         | Fragment  | C7H10O5PS        | 236.9973         | 8.36                 | 0.22             |
| Fensulfothion oxon sulfone              | Precursor | C11H17O6PS       | 309.05563        | 8.62                 |                  |
|                                         | Fragment  | C6H8O4P          | 175.0151         | 8.63                 | 0.21             |
| Fensulfothion sulfone                   | Precursor | C11H17O5PS2      | 325.03278        | 11.09                |                  |
|                                         | Fragment  | C7H10O5PS2       | 268.9692         | 11.08                | 0.31             |
| Haloxypop ethotyl                       | Precursor | C19H19CIF3NO5    | 434.09766        | 14.14                |                  |
|                                         | Fragment  | C14H10CIF3NO2    | 316.0334         | 14.13                | 0.35             |
| Haloxypop methyl                        | Precursor | C16H13CIF3NO4    | 376.0558         | 13.75                |                  |
|                                         | Fragment  | C14H10CIF3NO2    | 316.0334         | 13.75                | 0.27             |
| Omethoate                               | Precursor | C5H12NO4PS       | 214.02974        | 1.79                 |                  |
|                                         | Fragment  | C2H2O3PS         | 124.9821         | 1.78                 | 0.42             |

|                                          |           |                 |           |       |      |
|------------------------------------------|-----------|-----------------|-----------|-------|------|
| Terbufos sulfone                         | Precursor | C9H21O4PS3      | 321.04124 | 11.64 |      |
|                                          | Fragment  | C4H11O3PS       | 171.0244  | 11.65 | 0.16 |
| Terbufos sulfoxide                       | Precursor | C9H21O3PS3      | 305.04633 | 11.67 |      |
|                                          | Fragment  | C4H12O2PS2      | 187.0006  | 11.69 | 0.44 |
| <b>Compounds evaluated in Eggs</b>       |           |                 |           |       |      |
| Fipronil                                 | Precursor | C12H4Cl2F6N4OS  | 434.93143 | 12.8  |      |
|                                          | Fragment  | C10H2N3OCl2     | 249.9590  | 12.8  | 0.16 |
| Fipronil sulfone                         | Precursor | C12H4Cl2F6N4O2S | 450.92634 | 13.22 |      |
|                                          | Fragment  | C12H2ClF6N4O2S  | 414.9495  | 13.22 | 0.27 |
| Fipronil desulfinyl                      | Precursor | C12H4Cl2F6N4    | 386.96444 | 12.64 |      |
|                                          | Fragment  | C11H2ClF3N4     | 281.9934  | 12.64 | 0.19 |
| Fipronil sulphide                        | Precursor | C12H4Cl2F6N4S   | 418.93652 | 12.98 |      |
|                                          | Fragment  | C11H3Cl2F3      | 261.9574  | 12.98 | 0.84 |
| <b>Subrogate and injection standards</b> |           |                 |           |       |      |
| Carbendazim-d3                           | Precursor | D3C9H6N3O2      | 195.09558 | 3.2   |      |
|                                          | Fragment  | C8H6N3O         | 160.0497  | 3.23  | 0.51 |
| Dichlorvos-d6                            | Precursor | D6C4HCl2O4P     | 226.99084 | 8.99  |      |
|                                          | Fragment  | D6C2O3P         | 115.0423  | 8.98  | 0.55 |
| Dimethoate-d6                            | Precursor | D6C5H6NO3PS2    | 236.04456 | 11.22 |      |
|                                          | Fragment  | C2D6O2PS        | 131.0193  | 10.63 | 1.22 |
| Malathion-d10                            | Precursor | D10C10H9O6PS2   | 341.10611 | 11.81 |      |
|                                          | Fragment  | DC4H2O3         | 100.0138  | 11.8  | 0.28 |

\* Ion Ratio (F/P): Fragment ion peak area/Precursor ion peak area
